CORRECTION

# Correction: A selection study on a laboratory-designed population of salmon lice (*Lepeophtheirus salmonis*) using organophosphate and pyrethroid pesticides

The PLOS ONE Staff

## Notice of Republication

This article was republished on May 26, 2017, as the original article title was published in error. The correct title, “A selection study on a laboratory-designed population of salmon lice (*Lepeophtheirus salmonis*) using organophosphate and pyrethroid pesticide,” was incorrectly published as “A selection study on a laboratory-designed population of salmon lice (*Lepeophtheirus salmonis*) using organophosphate and pyrethroid pesticides.” The publisher apologizes for the error.

## Reference

1. Myhre Jensen E, Sevatdal S, Bakke MJ, Kaur K, Horsberg TE (2017) A selection study on a laboratory-designed population of salmon lice (*Lepeophtheirus salmonis*) using organophosphate and pyrethroid pesticides. PLoS ONE 12(5): e0178068. <https://doi.org/10.1371/journal.pone.0178068> PMID: [28531206](https://pubmed.ncbi.nlm.nih.gov/28531206/)

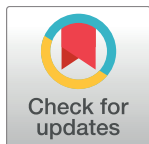

## OPEN ACCESS

**Citation:** The PLOS ONE Staff (2017) Correction: A selection study on a laboratory-designed population of salmon lice (*Lepeophtheirus salmonis*) using organophosphate and pyrethroid pesticides. PLoS ONE 12(7): e0181388. <https://doi.org/10.1371/journal.pone.0181388>

**Published:** July 10, 2017

**Copyright:** © 2017 The PLOS ONE Staff. This is an open access article distributed under the terms of the [Creative Commons Attribution License](https://creativecommons.org/licenses/by/4.0/), which permits unrestricted use, distribution, and reproduction in any medium, provided the original author and source are credited.
